# PREVALENCE OF HUMAN AND ANIMAL AFRICAN TRYPANOSOMIASIS IN NIGERIA: A SCOPING REVIEW

Elizabeth O. Odebunmi<sup>1</sup>, Chukwuemeka Ibeachu<sup>1</sup>, Chinwe U. Chukwudi<sup>2\*</sup>

<sup>1</sup>Department of Public Health, School of Health and Society, University of Wolverhampton, UK

<sup>2</sup>Department of Veterinary Pathology and Microbiology, University of Nigeria Nsukka. Enugu State, Nigeria.

\*Correspondence: [chinwe.chukwudi@unn.edu.ng](mailto:chinwe.chukwudi@unn.edu.ng), [cuchukwudi@gmail.com](mailto:cuchukwudi@gmail.com)

## ABSTRACT

### Background

African trypanosomiasis continues to pose a substantial threat to both human and animal health in sub-Saharan Africa. This study examined the prevalence of African trypanosomiasis within human and animal populations in Nigeria, the trypanosome species involved, the spread of animal reservoirs, and the variability in diagnostic methodologies employed.

### Methodology/principal findings

A scoping review was performed, following the methodological framework outlined in PRISMA-ScR checklist. Eligible studies were explored for disease prevalence, causative parasites, reservoir hosts, and diagnostic techniques used. A total of 16 eligible studies published between 1993 and 2021 were retrieved. 13 studies reported the prevalence of African trypanosomiasis in animals, and 3 for humans. Varying prevalence rates were recorded depending on the host population and

diagnostic methods employed. The overall prevalence of Animal African Trypanosomiasis (AAT) and Human African Trypanosomiasis (HAT) was 27.3% (4,404/16,117) and 3.6% (72/1,974) respectively. The highest incidence of HAT was detected using the Card Agglutination Test for Trypanosomiasis (CATT), whereas that of AAT was observed using PCR, followed by microscopy which was the most extensively employed technique in this study. The various diagnostic methods used in various studies showed a variety of sensitivities and specificities, affecting the accuracy of disease detection. Remarkably, domestic animals like cattle, pigs, and dogs were identified as potential reservoirs for the human-infective parasites (*T. b. gambiense*) in Nigeria.

## Conclusion

This study highlights the high prevalence rate and complex epidemiology of African trypanosomiasis in humans and animals in Nigeria. These findings underscore the importance of comprehensive measures involving both veterinary and human health sectors to combat African trypanosomiasis effectively in Nigeria. Only few studies have investigated the prevalence of HAT in Nigeria. Hence, adequately coordinated epidemiological surveys are imperative to ascertain the true epidemiological status of HAT in Nigeria and inform targeted intervention policies to achieve WHO's NTD elimination targets in 2030.

## INTRODUCTION

African Trypanosomiasis (AT) is one of the Neglected Tropical Diseases (NTDs) with an estimated 60 million people at risk of infection in sub-Saharan Africa,<sup>1,2</sup> as well as various animals such as dogs, cattle, pigs, sheep and goats.<sup>3,4</sup> This vector-borne disease, caused by a protozoan

parasite of the genus *Trypanosoma*, are transmitted by tsetse flies to both humans and animals.<sup>5</sup> Animal African Trypanosomiasis (AAT), also known as Nagana, is caused by various trypanosome species, including *T. brucei*, *T. congolense*, *T. vivax*, *T. equiperdum*, *T. evansi*, *T. simiae*, *T. suis*, and *T. theileri*.<sup>6, 7</sup> While cattle are the most affected, other animals such as goats, dogs, sheep, pigs, and wild animals are also susceptible.<sup>8</sup> *T. equiperdum* causes a venereal disease (Dourine) in horses and donkeys, while *T. evansi* causes a form of trypanosomiasis known as Surra in horses, camels, buffaloes, mules, and deer.<sup>9</sup>

Two sub-species of *Trypanosoma brucei* cause Human African Trypanosomiasis (HAT), also known as sleeping sickness. *Trypanosoma brucei gambiense* (Tbg), found in 24 countries in West and Central Africa, is responsible for 97% of all reported cases, and causes a chronic disease. *Trypanosoma brucei rhodesiense* (Tbr), which is found in 13 countries in East and Southern Africa, is responsible for 3% of all reported cases and causes an acute disease.<sup>10</sup> Unlike Tbg, which mostly infects humans (although some animal reservoirs/hosts have been identified), Tbr causes disease in both humans and animals.<sup>11</sup>

The transmission of both HAT and AAT heavily depends on tsetse fly (*Glossina sp.*), exclusively found in sub-Saharan Africa.<sup>12</sup> Nevertheless, maternal and sexual transmission has been indicated for HAT, although their exact contributions to the epidemiology of the human disease has not been fully explored.<sup>13</sup> The coexistence of humans, vectors, and parasites in a conducive environment in the tropical trypanosomiasis belt of Africa, coupled with the presence of animal reservoir hosts, makes HAT a significant public health challenge, with detrimental effects on health, the economy, poverty levels, and agricultural productivity.<sup>14, 15</sup>

Reported cases of HAT globally have substantially declined to fewer than 1,000 cases between 2019 and 2020.<sup>10</sup> This decline is attributed to HAT control strategies and inclusion in the Neglected

Tropical Diseases, with a roadmap aiming to eliminate gHAT as a public health concern by 2020 and zero transmission to humans by 2030.<sup>16</sup> However, disease monitoring and epidemiological surveillance is grossly inadequate in many endemic countries.<sup>17</sup> One of the prerequisites for a disease to be eradicable is the absence of animal reservoirs.<sup>18</sup> Therefore, in addition to latent infections and inadequate diagnostic tools/capacity, the presence of potential animal reservoir hosts for both Tbg and Tbr is a major challenge to the complete elimination of HAT across sub-Saharan Africa including Nigeria.<sup>19, 20</sup>

Nonetheless, it is still unclear how important these non-human hosts are in maintaining the transmission of gHAT.<sup>21</sup> Without addressing the knowledge gaps regarding *T. b. gambiense* reservoirs, complete gHAT eradication remains unattainable.<sup>22</sup> To fill this gap, adequate epidemiological information about the co-circulation of human and animal trypanosomes is critical, as these sites could potentially present breeding grounds for new epidemic strains of the parasites. Therefore, this study examined the prevalence of African trypanosomiasis in both humans and animals in Nigeria, focusing on the complex interactions among disease transmission dynamics, parasite variation, diagnostic techniques, and possibility of cross infection between humans and animals.

## METHODS

This study follows the Preferred Reporting Items for Systematic Reviews and Meta-Analyses (PRISMA-ScR) four-stage framework, encompassing identification, screening, eligibility assessment, and inclusion to ensure a transparent, accurate, and high-quality reporting of the review's findings.<sup>23</sup>

### Search Strategy

The searches were performed using MEDLINE, CINAHL, and EMBASE in July 2023. The search terms included ‘Neglected Tropical Disease,’ ‘African trypanosomiasis,’ ‘human African trypanosomiasis,’ ‘animal African trypanosomiasis,’ ‘sleeping sickness,’ ‘nagana,’ ‘trypanosoma,’ ‘trypanosomosis,’ ‘trypanosomes.’ These terms were combined using Boolean operators ‘OR’, as well as ‘AND’ to retrieve relevant articles. A manual search was also performed to ensure that all relevant studies were captured.

## **Eligibility Criteria**

The eligibility criteria for this review were informed by participants (P), phenomena of interest (I), and context (Co) or PICO, where P is humans/animals with AT, I is African trypanosomiasis infection and Co is Nigeria. Primary studies including cross sectional, cohort, surveys, and prevalence studies that reported animal and human African trypanosomiasis infection were included. Specific inclusion criteria included studies from Nigeria, published in English language with well detailed sample size, prevalence of trypanosomiasis in sampled population, method of diagnosis and *Trypanosoma* species identified.

## **Study Selection**

Study selection was performed independently by two authors. Discrepancies between the authors were resolved through discussion until a consensus was reached. After duplicates were removed, the remaining studies were screened based on their titles and abstracts. Subsequently, non-relevant studies were excluded, and the full text of the remaining studies were assessed according to the pre-defined eligibility criteria. Finally, studies that met the eligibility criteria were included for further data extraction.

## **Data Extraction**

Studies were extracted into a pre-prepared Microsoft Excel spreadsheet with the following variables: author and year of publication, study subject (human, animal), type of study design, study size, *Trypanosoma* species identified, diagnostic method used, number of positive cases, prevalence, or percentages.

## Data Synthesis

A narrative summary was performed to synthesize findings from this review.

## RESULTS

A total of 1,977 articles were retrieved from the search of three databases. 59% (1,159) from MEDLINE, 36% (724) from EMBASE and 5% (94) from CINAHL. After removal of 40 duplicates, 1,937 articles were screened for titles and abstracts. A total of 1,787 non-relevant articles were excluded in accordance with the predetermined criteria. Following full text retrieval, another 25 studies were excluded as their full texts were not accessible. Upon review of the full texts of the remaining 125 articles, a total of 11 were deemed eligible for inclusion in the study. An additional 5 articles were identified from a search of reference lists. Finally, 16 articles were included. The study selection process is represented in table I.

### Description of eligible studies

All included studies were published between 1993 and 2021, with the number of study subjects ranging from 19 to 7,143 and an overall sample size of 18,091. Of the 16 included studies, three investigated human African trypanosomiasis,<sup>24, 25, 26</sup> while thirteen studies reported animal African trypanosomiasis. Five of these reported infection in cattle - bovine trypanosomiasis.<sup>27,28, 29, 30,31</sup> Two studies investigated trypanosomiasis infection in pigs – porcine trypanosomiasis.<sup>32, 33</sup> Three studies investigated infection in ruminants – sheep, goat, cattle,<sup>34,35,36</sup> while one study investigated

in dogs – canine trypanosomiasis.<sup>37</sup> The remaining two studies investigated infection in multiple animal hosts including monkey.<sup>38, 39</sup> Table II provides a summary of the included studies.

### **Prevalence of HAT**

A total of 1,974 individuals underwent testing for the disease across three studies. Among them, 72 individuals tested positive for the disease in two of the studies.<sup>24,25</sup> Notably, the third study conducted did not yield any positive cases within the sampled population.<sup>26</sup> The overall prevalence of HAT as examined by these studies is 3.6% (72/1,974) with *Trypanosoma brucei gambiense* detected as the causative organism.

### **Prevalence of AAT**

Thirteen included studies reported AAT with an overall sample size of 16,117. The highest sampled animal was cattle at 12,193, while the least is monkey at 1 sample. Others are 577 sheep, 418 goat, 2,639 pigs, 31 dogs, and 318 belonging to small ruminants (unspecified). Out of the total sampled animals, 4,404 were found positive for trypanosomiasis infection from all the 13 studies. The overall mean prevalence of AAT is 27.3% (4,404/16,117).

A total of 12 studies detected the animal infective trypanosomes: *T. vivax*, *T. congolense*, *T. brucei*, *T. simiae*, *T. evansi*, *T. theileri* in the studied samples. However, *T. vivax*, *T. congolense*, and *T. brucei* were the most prevalent. In addition to these trypanosomes, three of these studies detected the human infective parasite *Trypanosoma brucei gambiense* in the animals.<sup>33, 37, 38</sup>

### **Diagnostic Techniques**

The included studies for this review utilized various diagnostic methods, including microscopy, CATT (Card Agglutination Test for Trypanosomiasis), and Polymerase Chain Reaction (PCR) in

the detection of trypanosomes. Overall, microscopy was the most utilized diagnostic technique of eleven studies. While the remaining studies utilized CATT and PCR, individually, together or in addition to microscopy.

## DISCUSSION

The findings from this review, provides comprehensive insights into the prevalence, species distribution, and diagnostics variations of African trypanosomiasis in humans and animals in Nigeria. According to this study's findings, the prevalence of AAT in Nigeria is 27.3% (4,404 out of 16,117), while prevalence of HAT is 3.6% (72 out of 1,974). This indicates that African trypanosomiasis is still endemic in both humans and animals in Nigeria. The presence of various trypanosome species and different diagnostic methods contributes to the complexity of this disease and its significance for public health. The study identified several trypanosomes, including *T. vivax*, *T. congolense*, *T. brucei brucei*, *T. simiae*, *T. evansi*, *T. theileri* and *T. brucei gambiense* as the causative pathogens of trypanosomiasis infection in animals and humans. Additionally, the most used diagnostic techniques in Nigeria, for detecting these trypanosomes are microscopic examination, CATT, and PCR.

### **The Prevalence of human African trypanosomiasis in Nigeria**

Human African trypanosomiasis has been included in the Neglected Tropical Diseases Road map, aiming to eliminate HAT as a public health concern by 2020 and prevent the transmission of *Trypanosoma brucei gambiense* (Tbg) to humans by 2030.<sup>16</sup> The criteria for elimination are set at fewer than 2,000 reported cases annually and no more than 1 case per 10,000 residents in areas at moderate or high risk.<sup>17</sup> Several endemic African countries, such as Benin, Côte d'Ivoire,



Equatorial Guinea, Togo, and Uganda, have successfully eliminated gambiense Human African Trypanosomiasis (gHAT) as a public health problem.<sup>10</sup> However, Nigeria still faces challenges in achieving this goal. This study reveals that Nigeria has a higher prevalence rate of 3.6% (72 out of 1,974) for HAT compared to 0.06% in Côte d'Ivoire and 0.88% in Uganda.<sup>40,41</sup> These findings suggest that the disease is still a significant health issue in Nigeria, and the country has not yet successfully eliminated *gambiense* Human African Trypanosomiasis (gHAT) as a public health concern.

Despite the World Health Organization reporting eight new HAT cases in Nigeria between 2010 and 2016,<sup>42</sup> the results of this analysis present a different perspective. During this period, three of the studies included in this analysis collectively identified 72 HAT cases out of a total of 1,974 individuals assessed, with the parasites isolated from 7 individuals.<sup>25</sup> This notable difference suggests that the actual prevalence of HAT in Nigeria might be underestimated. This could be attributed to the fact that identification of HAT cases has not been incorporated into routine diagnostic procedures in Nigeria's healthcare facilities despite being an endemic country.<sup>25</sup> This reflects the limited attention that HAT receives in endemic regions.<sup>43</sup>

### **Prevalence of AAT in Nigeria**

This study has unveiled an overall prevalence rate of 27.3% for animal African trypanosomiasis, which is higher than the 16.1% in previous review.<sup>44</sup> This increased prevalence rate among animals in Nigeria raises additional concerns regarding their potential role in the transmission of African trypanosomiasis to humans. A notable finding from this study is the presence of the human-infective *T. brucei gambiense* in pigs, dogs, and cattle.<sup>33,37,38</sup> Similar findings have been documented in various sub-Saharan African nations.<sup>45,46,47</sup>

Although the precise role of these animal hosts in transmission is not entirely clear, their presence poses a potential threat to the goal of eliminating HAT transmission to humans by 2030.<sup>22</sup> While the zoonotic potential of *T. brucei gambiense* has been a subject of significant discussion over the years, the confirmation of its presence in animal hosts highlights the possibility of transmission between humans and animals. In Nigeria, the existence of these animal reservoirs could be contributing to the persistence and spread of Human African Trypanosomiasis (HAT). Furthermore, it might be a factor behind the limited success of the methods used to control and eliminate gambiense HAT. Therefore, it is crucial to conduct further research to gain a comprehensive understanding of the specific role played by these animal reservoirs in the transmission of HAT.

## **The Diagnosis of Trypanosomiasis**

The diagnosis of trypanosomiasis relies on various methods like parasitological, serological, and molecular tests, each with different levels of accuracy, ease of use, and cost.<sup>8</sup> For instance, less sensitive diagnostic procedures are more likely to give false negative results, leading to an underestimation of the true prevalence of the disease. Conversely, more sensitive diagnostic tests can detect more positive cases that might be missed by less precise methods, resulting in higher reported prevalence rates.<sup>48,49</sup> Consequently, the choice of diagnostic methods and their accuracy can significantly affect the detection of infected individuals or animals and the reported prevalence rates.<sup>50</sup>

Microscopic examination was found to be the most used method for identifying trypanosomiasis infections in both animals and humans in this review. However, this method has faced criticism for its low sensitivity, especially in cases with low parasitemia characteristic of human infections with TbG, which can result in the underestimation of HAT prevalence rates.<sup>51</sup> On the other hand,

Polymerase Chain Reaction has been acknowledged as the preferred diagnostic method for epidemiological investigations concerning *Trypanosoma sp.* due to its high sensitivity and capacity for processing many samples.<sup>52</sup> This aligns with the results of this study, where the use of both microscopy and PCR on the same group of samples revealed that microscopic examination detected a lower prevalence rate compared to PCR.

As observed in one of the studies, the prevalence of AAT in cattle using microscopy was 15.1% while PCR detected a higher prevalence of 63.7%.<sup>31</sup> This substantial gap in prevalence rates can be attributed to the varying sensitivities of the two methods. Similarly, when examining *T. b. gambiense* infections in humans using the Card Agglutination Test for Trypanosomiasis (CATT) and PCR, different prevalence rates were detected.<sup>25</sup> CATT showed an overall prevalence rate of 1.8%, whereas PCR indicated a lower rate of 0.6% among the same sampled population of 1200 individuals. This discrepancy in prevalence rates between the two diagnostic techniques underscores the high specificity of PCR and the potential for false-positive results from CATT.<sup>53</sup> In addition, there exists a substantial likelihood of encountering false negative results, primarily attributable to discrepancies in antigen types utilized in the CATT assay kit especially in Nigeria and Cameroon. On the other hand, the lower prevalence detected with PCR could result from DNA extraction and handling methods in view of the low parasitemia characteristic of gHAT infections and may also reflect the chronicity of the infections in the sampled populations.

The variation in prevalence rates has also been linked to the capacity of diagnostic tools to identify trypanosomes down to the subspecies level. Unlike the PCR method, which has the capability to directly categorize trypanosomes based on their species classification,<sup>46</sup> the microscopy technique is limited in its ability to distinguish between different species and subspecies.<sup>37</sup> In this review, the

polymerase chain reaction approach was successful in detecting the human-infectious parasite *T. b. gambiense* in animals.<sup>37,38</sup>

In summary, the choice of diagnostic methods significantly impacts the reported prevalence rates of trypanosomiasis. This emphasizes the importance of carefully considering the methods used when interpreting and comparing prevalence data across different studies and locations. However, these choices are often influenced by factors like the availability of trained staff, cost, ease of use, and the diagnostic tool's useability.<sup>54</sup> Nigeria, being a developing nation, faces challenges related to limited resources, funding, and healthcare personnel. This may explain why microscopy is frequently used for trypanosomiasis detection in Nigeria compared to other methods as it requires minimal equipment and is a cost-effective way to detect the disease.<sup>8</sup>

## Conclusion

This study highlighted the high prevalence rate of African trypanosomiasis infection in both humans and animals in Nigeria, evidence of the persistent threat that the disease poses to the health of humans and animals. The identification of pigs, dogs, and cattle as reservoir hosts for the human-infective parasite *Trypanosoma brucei gambiense* underscores the potential for cross-species transmission between humans and animals. Thus, highlighting the zoonotic potential of *gambiense* Human African Trypanosomiasis (gHAT). This presents a significant challenge to the 2030 objective of eliminating gHAT as a public health concern and terminating its transmission to human populations.

To enhance the efficacy of disease control measures, additional research is imperative to elucidate the precise roles played by animal reservoir hosts and establish more effective diagnostic techniques for the detection of the trypanosomes in low resource endemic areas.

Table I: Flow chart of study selection process

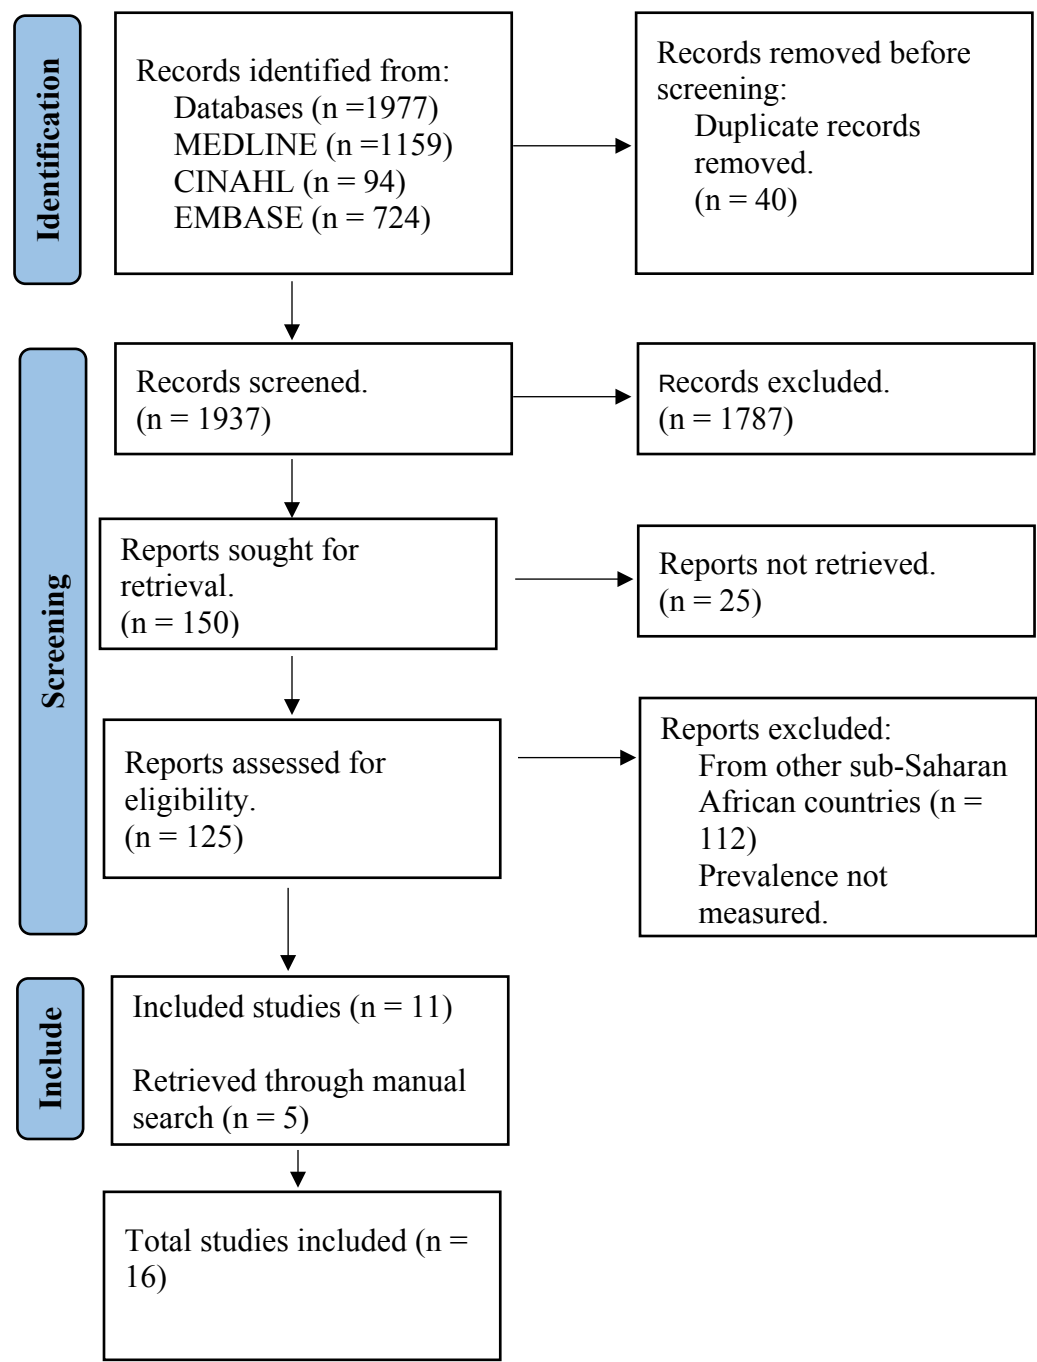

**Table II: Summary of the characteristics of the reviewed articles**

| Author/Year         | Title                                                                     | Aim                                                                                                                   | City/Area                                               | Study Design           | Study Population | Sample Size | Outcome Measured       | Result                                                                                                                                                                                                 | Prevalence rate | Diagnostic Method | Species Identified                                          |
|---------------------|---------------------------------------------------------------------------|-----------------------------------------------------------------------------------------------------------------------|---------------------------------------------------------|------------------------|------------------|-------------|------------------------|--------------------------------------------------------------------------------------------------------------------------------------------------------------------------------------------------------|-----------------|-------------------|-------------------------------------------------------------|
| Daniel et al., 1993 | Prevalence of bovine trypanosomiasis in Gongola State of Northern Nigeria | To assess the prevalence of bovine trypanosomiasis in Karim Lamido and Numan local government areas of Gongola State. | Adamawa: Formerly Gongola (Karim Lamido and Numan LGAs) | Cross-sectional Survey | Cattle           | 1065        | Bovine trypanosomiasis | A total of 42 (3.9 %) Cattle were found to be infected with trypanosomes. Out of which 27 (64.3 %) were due to <i>T. vivax</i> , 13 (31 %) to <i>T. congolense</i> and 2 (4.8 %) to <i>T. brucei</i> . | 3.90%           | Microscopy        | <i>T. vivax</i><br><i>T. congolense</i><br><i>T. brucei</i> |

|                      |                                                                                  |                                                                                                                         |                                  |                        |            |                               |                                |                                                                                                                                                                                                           |       |            |                                                             |
|----------------------|----------------------------------------------------------------------------------|-------------------------------------------------------------------------------------------------------------------------|----------------------------------|------------------------|------------|-------------------------------|--------------------------------|-----------------------------------------------------------------------------------------------------------------------------------------------------------------------------------------------------------|-------|------------|-------------------------------------------------------------|
| Daniel et al., 1994  | Prevalence of trypanosomiasis in sheep and goats in a region of northern Nigeria | To investigate the sensitivity of four techniques currently in use for the parasitological diagnosis of trypanosomosis. | Bauchi (Alkaleri and Gombe LGAs) | Cross-sectional Survey | Sheep Goat | 615 (258 sheep and 357 goats) | Animal African trypanosomiasis | A total of 19 (7.4%) sheep and 18 (5.0%) goats were positive giving a total infection rate of 37 (6.0%), 22 being positive with <i>T. vivax</i> , 9 with <i>T. congolense</i> and 6 with <i>T. brucei</i> | 6%    | Microscopy | <i>T. vivax</i><br><i>T. congolense</i><br><i>T. brucei</i> |
| Enwezor et al., 2009 | Survey of bovine trypanosomosis in the                                           | To assess the prevalence of trypanosomes in cattle at                                                                   | Kaduna                           | Cross-sectional Survey | Cattle     | 1293                          | Bovine trypanosomiasis         | A total of 109 cattle were infected with trypanosomes giving an overall prevalence                                                                                                                        | 8.40% | Microscopy | <i>T. vivax</i><br><i>T. congolense</i><br><i>T. brucei</i> |

|                                               |                                                                                                |                                                                                                        |       |                                   |                                                     |                                                                    |                                          |                                                                                                                                                                                                                                     |       |                |                                                                                      |
|-----------------------------------------------|------------------------------------------------------------------------------------------------|--------------------------------------------------------------------------------------------------------|-------|-----------------------------------|-----------------------------------------------------|--------------------------------------------------------------------|------------------------------------------|-------------------------------------------------------------------------------------------------------------------------------------------------------------------------------------------------------------------------------------|-------|----------------|--------------------------------------------------------------------------------------|
|                                               | Kachia<br>Grazing<br>Reserve,<br>Kaduna<br>State,<br>Nigeria                                   | the Kachia<br>Grazing<br>Reserve<br>(KGR)                                                              |       |                                   |                                                     |                                                                    |                                          | of 8.4%. Out of these,<br>105 (96.3%) was due<br>to <i>T. vivax</i> , 2 (1.9%)<br>to <i>T. congolense</i> , 1<br>(0.9%) to <i>T. b. brucei</i><br>and a mixed infection<br>of <i>T. congolense</i> and<br><i>T. vivax</i> 1 (0.9%). |       |                | <i>T. brucei</i><br><br><i>brucei</i>                                                |
| Enwe<br>zor <i>et</i><br><i>al.</i> ,<br>2019 | Investigatio<br>n of<br>livestock<br>for presence<br>of<br>Trypanoso<br>ma brucei<br>gambiense | Aimed at<br>screening<br>livestock for<br>possible<br>presence of<br>T. b.<br>gambiense<br>within Tafa | Niger | Cross-<br>section<br>al<br>Survey | Cattle<br>Sheep<br>Goats<br>Local<br>dogs<br>Monkey | 460<br>animals<br>(177<br>cattle,<br>209<br>sheep,<br>61<br>goats, | Animal<br>African<br>trypanos<br>omiasis | A total of 10 animals<br>were positive for<br>trypanosomes with an<br>overall prevalence of<br>2.17 %. The<br>morphological<br>identification<br>indicated the presence                                                             | 2.17% | Microsco<br>py | <i>T. brucei</i><br><br><i>T.</i><br><i>congolens</i><br><i>e</i><br><i>T. vivax</i> |



|               |                                                                      |                                                                     |       |                   |        |                                          |                               |                                                                                                                                                                                                                                                                                                                                           |                      |                           |                                                            |
|---------------|----------------------------------------------------------------------|---------------------------------------------------------------------|-------|-------------------|--------|------------------------------------------|-------------------------------|-------------------------------------------------------------------------------------------------------------------------------------------------------------------------------------------------------------------------------------------------------------------------------------------------------------------------------------------|----------------------|---------------------------|------------------------------------------------------------|
|               | In Tafa<br>Local<br>Government<br>Area of<br>Niger State,<br>Nigeria | Local<br>Government<br>Area (LGA)<br>of Niger<br>State,<br>Nigeria. |       |                   |        | 12 local<br>dogs<br>and 1<br>monkey<br>) |                               | of <i>T. brucei</i> , <i>T. vivax</i><br>and a mixed infection<br>of <i>T. brucei</i> and <i>T.</i><br><i>congolense</i> . Details by<br>animal species<br>showed 3 cattle (1.69<br>%), 6 sheep (3.02 %)<br>and 1 goat (1.64 %)<br>infected with<br>trypanosomes. Neither<br>the dogs nor the<br>monkey was positive<br>for trypanosomes. |                      |                           |                                                            |
| Habee<br>b et | Molecular<br>identificatio<br>n and                                  | To<br>investigate<br>the                                            | Kwara | Cross-<br>section | Cattle | 398                                      | Bovine<br>trypanos<br>omiasis | A total of 3 Cattle<br>were positive by<br>microscopy,                                                                                                                                                                                                                                                                                    | Microscop<br>y: 0.8% | PCR<br><br>Microscop<br>y | <i>T. theileri</i><br><i>T. evansi</i><br><i>T. simiae</i> |

|                      |                                                                                                                                                |                                                                                                                                                                                                                                         |  |              |  |  |  |                                                                                                                                                                     |              |  |                                                                                                  |
|----------------------|------------------------------------------------------------------------------------------------------------------------------------------------|-----------------------------------------------------------------------------------------------------------------------------------------------------------------------------------------------------------------------------------------|--|--------------|--|--|--|---------------------------------------------------------------------------------------------------------------------------------------------------------------------|--------------|--|--------------------------------------------------------------------------------------------------|
| <i>al.</i> ,<br>2021 | prevalence<br>of<br>trypanosom<br>es in cattle<br>distributed<br>within the<br>Jebba axis<br>of the River<br>Niger,<br>Kwara state,<br>Nigeria | prevalence of<br>trypanosome<br>infection in<br>cattle, and<br>molecularly<br>identified the<br>species of<br>trypanosomes<br>in infected<br>cattle and the<br>spatial<br>distribution<br>of<br>trypanosome-<br>infected<br>herds along |  | al<br>Survey |  |  |  | representing 0.8%<br>prevalence, while 12<br>samples representing<br>3.0% tested positive<br>by nested PCR. With<br><i>T. congolense</i> more<br>prevalent (50.0%). | PCR:<br>3.0% |  | <i>T.</i><br><br><i>congolens</i><br><br><i>e</i><br><br><i>T. brucei</i><br><br><i>T. vivax</i> |
|----------------------|------------------------------------------------------------------------------------------------------------------------------------------------|-----------------------------------------------------------------------------------------------------------------------------------------------------------------------------------------------------------------------------------------|--|--------------|--|--|--|---------------------------------------------------------------------------------------------------------------------------------------------------------------------|--------------|--|--------------------------------------------------------------------------------------------------|

|                                     |                                                                                                                                               |                                                                                                                                                                                                                                  |      |                                               |                                                              |                                                                                       |                                                      |                                                                                                                                                                                                                                                          |                                                                                                                                        |                    |                                                                               |
|-------------------------------------|-----------------------------------------------------------------------------------------------------------------------------------------------|----------------------------------------------------------------------------------------------------------------------------------------------------------------------------------------------------------------------------------|------|-----------------------------------------------|--------------------------------------------------------------|---------------------------------------------------------------------------------------|------------------------------------------------------|----------------------------------------------------------------------------------------------------------------------------------------------------------------------------------------------------------------------------------------------------------|----------------------------------------------------------------------------------------------------------------------------------------|--------------------|-------------------------------------------------------------------------------|
|                                     |                                                                                                                                               | the Jebba<br><br>axis of the<br><br>River Niger.                                                                                                                                                                                 |      |                                               |                                                              |                                                                                       |                                                      |                                                                                                                                                                                                                                                          |                                                                                                                                        |                    |                                                                               |
| Kalu<br><i>et al.</i> ,<br><br>1996 | Observation<br><br>s on the<br><br>epidemiolog<br><br>y of<br><br>ruminant<br><br>trypanosom<br><br>osis in Kano<br><br>State,<br><br>Nigeria | To evaluate<br><br>the<br><br>prevalence of<br><br>trypanosomo<br><br>sis among<br><br>ruminants in<br><br>Kano State<br><br>and to<br><br>elucidate<br><br>aspects of the<br><br>disease<br><br>transmission<br><br>in the area | Kano | Cross-<br><br>section<br><br>al<br><br>Survey | Ruminan<br><br>ts<br><br>(Cattle,<br><br>sheep,<br><br>goat) | 1424<br><br>(1106<br><br>cattle<br><br>and 318<br><br>small<br><br>rumina<br><br>nts) | Animal<br><br>African<br><br>trypanos<br><br>omiasis | 59 cattle were infected<br><br>with trypanosomes<br><br>giving a prevalence of<br><br>5.3% with a<br><br>confidence interval of<br><br>±1.3. Three out of 318<br><br>small ruminants<br><br>sampled were infected<br><br>(prevalence 0.9% ±<br><br>1.0). | Cattle:<br><br>5.3%<br><br>(95% CI:<br><br>4.0–<br><br>6.6%)Sm<br><br>all<br><br>ruminant<br><br>s (95%<br><br>CI: -0.1<br><br>– 1.9%) | Microscop<br><br>y | <i>T. vivax</i> <i>T.</i><br><i>congolens</i><br><i>e</i><br><i>T. brucei</i> |

|                                      |                                                                                                              |                                                                                                                     |       |                        |        |      |                               |                                                                                                                                                                                                       |                         |             |                        |
|--------------------------------------|--------------------------------------------------------------------------------------------------------------|---------------------------------------------------------------------------------------------------------------------|-------|------------------------|--------|------|-------------------------------|-------------------------------------------------------------------------------------------------------------------------------------------------------------------------------------------------------|-------------------------|-------------|------------------------|
|                                      |                                                                                                              | To conduct an active screening of T. b. gambiense in humans in the old Gboko sleeping sickness focus in Nigeria and |       |                        |        |      |                               | Out of sampled people, a total of 28 were found positive. The CATT revealed an overall infection rate of 1.8% of the 1200 samples studied. PCR revealed an overall infection rate of 0.6% of the 1200 |                         |             |                        |
| Karsh<br>ima <i>et al.</i> ,<br>2016 | Silent Human Trypanosoma brucei gambiense Infections around the Old Gboko Sleeping Sickness Focus in Nigeria | characterized isolates using TgsGP-polymerase                                                                       | Gboko | Cross-sectional Survey | Humans | 1200 | Human African trypanosomiasis | samples analysed. Trypanosomes (TbG) was isolated from 7 of the samples                                                                                                                               | CATT: 1.8%<br>PCR: 0.6% | CATT<br>PCR | <i>T. b. gambiense</i> |

|                                                |                                                                                                                                             |                                                                                                                                                                            |       |                                   |                |                                         |                                          |                                                                                                                                                                                                                                                                                                                             |                               |             |                                                                                                                                                                                                    |
|------------------------------------------------|---------------------------------------------------------------------------------------------------------------------------------------------|----------------------------------------------------------------------------------------------------------------------------------------------------------------------------|-------|-----------------------------------|----------------|-----------------------------------------|------------------------------------------|-----------------------------------------------------------------------------------------------------------------------------------------------------------------------------------------------------------------------------------------------------------------------------------------------------------------------------|-------------------------------|-------------|----------------------------------------------------------------------------------------------------------------------------------------------------------------------------------------------------|
|                                                |                                                                                                                                             | chain<br>reaction.                                                                                                                                                         |       |                                   |                |                                         |                                          |                                                                                                                                                                                                                                                                                                                             |                               |             |                                                                                                                                                                                                    |
| Karsh<br>ima <i>et</i><br><i>al.</i> ,<br>2016 | Animal<br>reservoirs<br>of<br>Trypanoso<br>ma brucei<br>gambiense<br>around the<br>old Gboko<br>sleeping<br>sickness<br>focus in<br>Nigeria | To ascertain<br>the possible<br>role of<br>animal<br>reservoirs in<br>the<br>epidemiology<br>of the<br>parasite in<br>the old<br>Gboko<br>sleeping<br>sickness<br>focus in | Gboko | Cross-<br>section<br>al<br>Survey | Cattle<br>Pigs | 1200<br>(600<br>Cattle,<br>600<br>Pigs) | Animal<br>African<br>trypanos<br>omiasis | A total of 118 animals<br>were positive (46<br>cattle, 72 pigs). The<br>overall infection rates<br>for the CATT and<br>TgsGP-PCR were 8.9<br>and 0.9%,<br>respectively.<br>Trypanosomes of<br>animal origin<br>identified by ITS 1<br>PCR were <i>T. brucei</i><br>(4.2%), <i>T. congolense</i><br>forest (3.2%), <i>T.</i> | CATT:<br>8.9%<br>PCR:<br>0.9% | CATT<br>PCR | <i>T. brucei</i><br>( <i>T. b.</i><br><i>gambiense</i><br>)<br><i>T.</i><br><i>congolens</i><br><i>e forest</i><br><i>T.</i><br><i>congolens</i><br><i>e</i><br><i>savannah</i><br><i>T. vivax</i> |

|  |  |                                                                           |  |  |  |  |  |                                                                                                                                                                                                                                                                                                                                                        |  |  |  |
|--|--|---------------------------------------------------------------------------|--|--|--|--|--|--------------------------------------------------------------------------------------------------------------------------------------------------------------------------------------------------------------------------------------------------------------------------------------------------------------------------------------------------------|--|--|--|
|  |  | Nigeria and characterized isolates using TgsGP polymerase chain reaction. |  |  |  |  |  | <i>congolense</i> savannah (2.0%), <i>T. vivax</i> (2.2%) and mixed infections (1.5%) in cattle as well as <i>T. brucei</i> (4.8%), <i>T. congolense</i> forest (1.8%), <i>T. congolense</i> savannah (1.0%) and mixed infections (1.2%) in pigs. <i>T. brucei gambiense</i> and other animal trypanosomes were identified among animals in the focus, |  |  |  |
|--|--|---------------------------------------------------------------------------|--|--|--|--|--|--------------------------------------------------------------------------------------------------------------------------------------------------------------------------------------------------------------------------------------------------------------------------------------------------------------------------------------------------------|--|--|--|

|                                                       |                                                                                                                                                                                |                                                                                                                                   |     |                                               |        |      |                                       |                                                                                                                                                                                                                                                                                                      |                                    |     |                                                                                                                   |
|-------------------------------------------------------|--------------------------------------------------------------------------------------------------------------------------------------------------------------------------------|-----------------------------------------------------------------------------------------------------------------------------------|-----|-----------------------------------------------|--------|------|---------------------------------------|------------------------------------------------------------------------------------------------------------------------------------------------------------------------------------------------------------------------------------------------------------------------------------------------------|------------------------------------|-----|-------------------------------------------------------------------------------------------------------------------|
|                                                       |                                                                                                                                                                                |                                                                                                                                   |     |                                               |        |      |                                       | indicating the<br><br>existence of animal<br><br>reservoirs of human<br><br>infective T. b.<br><br>gambiense.                                                                                                                                                                                        |                                    |     |                                                                                                                   |
| Majek<br>odun<br>mi <i>et</i><br><i>al.</i> ,<br>2013 | A<br><br>longitudinal<br><br>survey of<br><br>African<br><br>animal<br><br>trypanosomi<br><br>asis in<br><br>domestic<br><br>cattle on the<br><br>Jos Plateau,<br><br>Nigeria: | To determine<br><br>seasonal<br><br>variations in<br><br>the<br><br>prevalence of<br><br>AAT across<br><br>the Jos<br><br>Plateau | Jos | Cross-<br><br>section<br><br>al<br><br>Survey | Cattle | 7143 | Bovine<br><br>trypanos<br><br>omiasis | 3, 342 cattle were<br><br>found positive. The<br><br>prevalence of bovine<br><br>trypanosomiasis was<br><br>found to be high at<br><br>46.8% (39.0 – 54.5%)<br><br>and significant,<br><br>seasonal variation was<br><br>observed between the<br><br>dry and the end of the<br><br>wet season. T. b. | 46.8%<br><br>(39.0 –<br><br>54.5%) | PCR | <i>T.</i><br><br><i>congolens</i><br><br><i>e</i><br><br><i>T. vivax</i><br><br><i>T. b.</i><br><br><i>brucei</i> |

|                      |                                                                   |                                                                                 |               |                        |        |     |                               |                                                                                                                                                             |       |                    |                      |
|----------------------|-------------------------------------------------------------------|---------------------------------------------------------------------------------|---------------|------------------------|--------|-----|-------------------------------|-------------------------------------------------------------------------------------------------------------------------------------------------------------|-------|--------------------|----------------------|
|                      | Prevalence, distribution, and risk factors                        |                                                                                 |               |                        |        |     |                               | <i>brucei</i> was observed at a prevalence of 3.2% (1% – 5.5%); <i>T. congolense</i> at 27.7% (21.8% - 33.6%) and <i>T. vivax</i> at 26.7% (18.2% - 35.3%). |       |                    |                      |
| Nmor si et al., 2010 | Human African trypanosomiasis in endemic focus of Abraka, Nigeria | To investigate the prevalence of human African trypanosomiasis (HAT), caused by | Abraka, Delta | Cross-sectional Survey | Humans | 474 | Human African trypanosomiasis | Of the 474 screened, 44(9.3%) were seropositive with seroprevalence of 22(9.6%) in Urhouka, 14(9.5%) in Umeghe and 8(7.9%) for Ugonu.                       | 9.30% | Microscopy<br>CATT | <i>T.b.gambiense</i> |



|                        |                                                                                     |                                                                                                                                                                                     |                                 |                                               |      |      |                                        |                                                                                                                                                            |        |                    |                                                                           |
|------------------------|-------------------------------------------------------------------------------------|-------------------------------------------------------------------------------------------------------------------------------------------------------------------------------------|---------------------------------|-----------------------------------------------|------|------|----------------------------------------|------------------------------------------------------------------------------------------------------------------------------------------------------------|--------|--------------------|---------------------------------------------------------------------------|
|                        |                                                                                     | Trypanosoma<br><br>brucei<br><br>gambiense in<br><br>an endemic<br><br>focus of<br><br>Nigeria, as it<br><br>relates to age,<br><br>sex and<br><br>occupational<br><br>differences. |                                 |                                               |      |      |                                        |                                                                                                                                                            |        |                    |                                                                           |
| Omek<br>e,<br><br>1994 | Pig<br><br>trypanosom<br><br>osis:<br><br>prevalence<br><br>and<br><br>significance | To determine<br><br>the<br><br>prevalence of<br><br>trypanosome<br><br>species<br><br>pathogenic to                                                                                 | Anambra and<br><br>Benue states | Cross-<br><br>section<br><br>al<br><br>Survey | Pigs | 1954 | Porcine<br><br>trypanos<br><br>omiasis | 524 (26.8 %) were<br><br>positive for<br><br>trypanosome<br><br>infections, 348 (66.5<br><br>%) of which had a<br><br>mixed <i>T. brucei</i> and <i>T.</i> | 26.80% | Microsco<br><br>py | <i>T.</i><br><br><i>congolens</i><br><br><i>e</i><br><br><i>T. brucei</i> |

|                       |                                                                |                                                                                               |       |                        |      |    |                         |                                                                                                                                                     |        |            |                                                              |
|-----------------------|----------------------------------------------------------------|-----------------------------------------------------------------------------------------------|-------|------------------------|------|----|-------------------------|-----------------------------------------------------------------------------------------------------------------------------------------------------|--------|------------|--------------------------------------------------------------|
|                       | in the endemic Middle Belt zone of southern Nigeria            | pigs and the significance of pig trypanosomiasis in the Middle Belt zone of Southern Nigeria. |       |                        |      |    |                         | <i>congolense</i> burden, while 125 (23.9 %) and 43 (8.2 %) others had single <i>T. brucei</i> and <i>T. congolense</i> infections respectively.    |        |            |                                                              |
| Onah and Ebenebe 2004 | Isolation of a human serum-resistant Trypanosoma brucei from a | To re-evaluate the role of domestic pig as a reservoir for <i>T. b. gambiense</i>             | Enugu | Cross-sectional Survey | Pigs | 85 | Porcine trypanosomiasis | 19 positive cases were identified from the 85 sampled pigs. 15 (78.96%) were identified as single infection because of <i>T. brucei</i> . While the | 22.35% | Microscopy | <i>T. brucei</i><br><i>gambiense</i><br><i>T. congolense</i> |

|                     |                                                                                   |                                                                                                |                        |                        |        |     |                        |                                                                                                                                                             |                                                            |                |                                                             |
|---------------------|-----------------------------------------------------------------------------------|------------------------------------------------------------------------------------------------|------------------------|------------------------|--------|-----|------------------------|-------------------------------------------------------------------------------------------------------------------------------------------------------------|------------------------------------------------------------|----------------|-------------------------------------------------------------|
|                     | naturally infected pig in the Nsukka area of Enugu State                          |                                                                                                |                        |                        |        |     |                        | remaining 4 (21.05%) were due to mixed infections of <i>T. brucei</i> and <i>T. congolense</i> .                                                            |                                                            |                |                                                             |
| Takeet et al., 2013 | Molecular survey of pathogenic trypanosomes in naturally infected Nigerian cattle | To determine the prevalence and characteristics of trypanosome species and strains in Nigerian | Ogun and Kaduna states | Cross-sectional Survey | Cattle | 411 | Bovine trypanosomiasis | Parasite detection by microscopy observation showed 62 samples infected by one or more species of Trypanosomes, for a prevalence of 15.1% (95% CI, 12–18%). | Microscopy: 15.1% (95% CI, 12–18%).<br>PCR: 63.7% (95% CI, | Microscopy PCR | <i>T. brucei</i><br><i>T. vivax</i><br><i>T. congolense</i> |

|  |  |                                      |  |  |  |  |  |                                                                                                                                                                                                                                                                                                                         |             |  |  |
|--|--|--------------------------------------|--|--|--|--|--|-------------------------------------------------------------------------------------------------------------------------------------------------------------------------------------------------------------------------------------------------------------------------------------------------------------------------|-------------|--|--|
|  |  | cattle using PCR for the first time. |  |  |  |  |  | PCR detection showed 262 samples infected by one or more species of Trypanosoma, for an overall prevalence of 63.7% (95% CI, 59.4–68.8%) and <i>T. congolense</i> was the most prevalent 48.7% (95% CI, 4.2–54.3), followed by <i>T. vivax</i> 26.0% (95% CI, 21.8–31.1%) and <i>T. brucei</i> 4.4% (95% CI, 3.3–7.1%). | 59.4–68.8%) |  |  |
|--|--|--------------------------------------|--|--|--|--|--|-------------------------------------------------------------------------------------------------------------------------------------------------------------------------------------------------------------------------------------------------------------------------------------------------------------------------|-------------|--|--|

|                                |                                                                                             |                                                                                                     |        |                        |        |     |                               |                                                                                                                                                                                      |       |      |                        |
|--------------------------------|---------------------------------------------------------------------------------------------|-----------------------------------------------------------------------------------------------------|--------|------------------------|--------|-----|-------------------------------|--------------------------------------------------------------------------------------------------------------------------------------------------------------------------------------|-------|------|------------------------|
|                                |                                                                                             |                                                                                                     |        |                        |        |     |                               | Prevalence of mixed infections was 13.9% (95% CI, 10.6–17.4%) being co-infection by <i>T. congolense</i> and <i>T. vivax</i> .                                                       |       |      |                        |
| Uba<br><i>et al.</i> ,<br>2016 | Knowledge and prevalence of human african trypanosomiasis among residents of kachia grazing | To determine the knowledge, practices and prevalence of HAT among residents of the grazing reserve. | Kaduna | Cross-sectional Survey | Humans | 300 | Human African Trypanosomiasis | Of the 300 respondents that were examined and screened for HAT, none had palpable cervical lymph nodes enlargement, and none tested positive on CATT; hence HAT prevalence was zero. | 0.00% | CATT | <i>T. b. gambiense</i> |

|                                          |                                                                                                                            |                                                                                           |        |                                   |      |    |                                               |                                                                                                                                                |                            |     |                                      |
|------------------------------------------|----------------------------------------------------------------------------------------------------------------------------|-------------------------------------------------------------------------------------------|--------|-----------------------------------|------|----|-----------------------------------------------|------------------------------------------------------------------------------------------------------------------------------------------------|----------------------------|-----|--------------------------------------|
|                                          | reserve,<br><br>Kachia<br><br>local<br><br>government<br><br>area,<br><br>Kaduna<br><br>state,<br><br>Nigeria,<br><br>2012 |                                                                                           |        |                                   |      |    |                                               |                                                                                                                                                |                            |     |                                      |
| Umea<br>kuana<br><i>et al.</i> ,<br>2019 | Identification of<br><br>Trypanosoma brucei<br>gambiense<br>in naturally<br>infected                                       | To determine<br>which<br>trypanosome<br>species,<br>cause canine<br>trypanosomosis in the | Nsukka | Cross-<br>sectional<br><br>Survey | Dogs | 19 | Canine<br>African<br>Trypanosomiasis<br>(CAT) | All 19 dogs sampled<br><br>had canine<br>trypanosomosis<br>caused by<br>trypanosomes of the<br><i>T. brucei</i> group. Two<br>of the dogs were | <i>Tbg</i> :<br><br>10.52% | PCR | <i>T. b.</i><br><br><i>gambiense</i> |

|                |                                                                                 |                                                                                                                    |        |                                   |       |     |                                          |                                                                                                                                                                              |      |                |                                                                                  |
|----------------|---------------------------------------------------------------------------------|--------------------------------------------------------------------------------------------------------------------|--------|-----------------------------------|-------|-----|------------------------------------------|------------------------------------------------------------------------------------------------------------------------------------------------------------------------------|------|----------------|----------------------------------------------------------------------------------|
|                | dogs in<br>Nigeria                                                              | Nsukka area<br>of Nigeria<br>and whether<br>any dogs<br>harbor the<br>human-<br>infective<br>trypanosome,<br>Tbg1. |        |                                   |       |     |                                          | shown to be infected<br>with the human<br>pathogen <i>T. b.</i><br><i>gambiense</i> Group 1<br>(Tbg1).                                                                       |      |                |                                                                                  |
| Wayo<br>, 2017 | Prevalence<br>of<br>trypanosomi<br>asis in<br>sheep in the<br>Kachia<br>grazing | To update<br>information<br>on the<br>prevalence of<br>trypanosomia<br>sis in small<br>ruminants in                | Kaduna | Cross-<br>section<br>al<br>Survey | Sheep | 110 | Animal<br>African<br>trypanos<br>omiasis | A total of 45 (40.9%)<br>animals were found<br>positive. The<br>trypanosomes<br>observed were <i>T.</i><br><i>congolense</i> (40.0%),<br><i>T. Brucei</i> (28.8%), <i>T.</i> | 40.9 | Microsco<br>py | <i>T. brucei</i><br><i>T. vivax</i><br><i>T.</i><br><i>congolens</i><br><i>e</i> |

|  |                                                                    |                                                                                                                                                                    |  |  |  |  |  |                                                                 |  |  |  |
|--|--------------------------------------------------------------------|--------------------------------------------------------------------------------------------------------------------------------------------------------------------|--|--|--|--|--|-----------------------------------------------------------------|--|--|--|
|  | reserve,<br><br>Kachia,<br><br>Kaduna<br><br>State,<br><br>Nigeria | the area, to<br><br>allow for<br><br>proper<br><br>planning of<br><br>control<br><br>activities and<br><br>serve as<br><br>valuable<br><br>scientific<br><br>data. |  |  |  |  |  | <i>vivax</i> (17.7%) and<br><br>mixed infections<br><br>(13.3%) |  |  |  |
|--|--------------------------------------------------------------------|--------------------------------------------------------------------------------------------------------------------------------------------------------------------|--|--|--|--|--|-----------------------------------------------------------------|--|--|--|



## REFERENCES

1. Food and Agriculture Organization. The disease | Programme Against African Trypanosomosis (PAAT) | Food and Agriculture Organization of the United Nations. FAO Web site. <https://www.fao.org/paat/the-programme/the-disease/en/>. Updated 2024. Accessed Apr 9, 2024
2. Papagni R, Novara R, Minardi ML, et al. Human African Trypanosomiasis (sleeping sickness): Current knowledge and future challenges. *Frontiers in Tropical Diseases*. 2023;4. <https://www.frontiersin.org/articles/10.3389/ftd.2023.1087003>
3. Balasegaram M, Balasegaram S, Malvy D, Millet P. Neglected diseases in the news: a content analysis of recent international media coverage focussing on leishmaniasis and trypanosomiasis. *PLoS Negl Trop Dis*. 2008;2(5):e234. doi:10.1371/journal.pntd.0000234
4. Simarro PP, Diarra A, Ruiz Postigo JA, Franco JR, Jannin JG. The Human African Trypanosomiasis Control and Surveillance Programme of the World Health Organization 2000–2009: The Way Forward. *PLoS Negl Trop Dis*. 2011;5(2):e1007. doi:10.1371/journal.pntd.0001007
5. CDC. CDC - African Trypanosomiasis - Disease. CDC Web site. <https://www.cdc.gov/parasites/sleepingsickness/disease.html>. Updated 2020. Accessed Aug 15, 2023
6. Stevens JR, Brisse S. Systematics of trypanosomes of medical and veterinary importance. *CABI*. 2004:1–23. doi:10.1079/9780851994758.0001

7. Steverding D. The history of African trypanosomiasis. *Parasites & vectors*. 2008;1(1):1-8
8. Desquesnes M, Gonzatti M, Sazmand A, et al. A review on the diagnosis of animal trypanosomoses. *Parasit Vectors*. 2022;15(1):64. doi:10.1186/s13071-022-05190-1
9. Ponte-Sucre A. An Overview of Trypanosoma brucei Infections: An Intense Host–Parasite Interaction. *Front Microbiol*. 2016;7:2126. doi:10.3389/fmicb.2016.02126
10. World Health Organization. Trypanosomiasis, human African sleeping sickness. . : [https://www.who.int/news-room/fact-sheets/detail/trypanosomiasis-human-african-\(sleeping-sickness\)](https://www.who.int/news-room/fact-sheets/detail/trypanosomiasis-human-african-(sleeping-sickness)). Updated 2023. Accessed 13 November, 2023
11. Franco JR, Simarro PP, Diarra A, Jannin JG. Epidemiology of human African trypanosomiasis. *Clin Epidemiol*. 2014;6:257-275. doi:10.2147/CLEP.S39728
12. Brun R, Prof, Blum J, MD, Chappuis F, MD, Burri C, PhD. Human African trypanosomiasis. *Lancet*. 2010;375(9709):148-159. doi:10.1016/S0140-6736(09)60829-1
13. Lindner AK, Priotto G. The Unknown Risk of Vertical Transmission in Sleeping Sickness—A Literature Review. *PLOS Neglected Tropical Diseases*. 2010;4(12):e783. doi:10.1371/journal.pntd.0000783
14. Fèvre EM, Wissmann Bv, Welburn SC, Lutumba P. The Burden of Human African Trypanosomiasis. *PLOS Neglected Tropical Diseases*. 2008;2(12):e333. doi:10.1371/journal.pntd.0000333

15. Ilemobade AA. Tsetse and trypanosomosis in Africa: the challenges, the opportunities. *Onderstepoort J Vet Res.* 2009;76(1):35-40. doi:10.4102/ojvr.v76i1.59
  
16. World Health Organization. Accelerating work to overcome the global impact of neglected tropical diseases: a roadmap for implementation. <https://iris.who.int/handle/10665/338712>. Updated 2012. Accessed 9 April, 2024
  
17. Franco JR, Cecchi G, Priotto G, et al. Monitoring the elimination of human African trypanosomiasis at continental and country level: Update to 2018. *PLOS Neglected Tropical Diseases.* 2020;14(5):e0008261. doi:10.1371/journal.pntd.0008261
  
18. Molyneux DH, Hopkins DR, Zagaria N. Disease eradication, elimination and control: the need for accurate and consistent usage. *Trends in Parasitology.* 2004;20(8):347-351. doi:10.1016/j.pt.2004.06.004
  
19. Büscher P, Bart J, Boelaert M, et al. Do Cryptic Reservoirs Threaten Gambiense-Sleeping Sickness Elimination? *Trends Parasitol.* 2018;34(3):197-207. doi:10.1016/j.pt.2017.11.008
  
20. Geerts M, Chen Z, Bebronne N, et al. Deep kinetoplast genome analyses result in a novel molecular assay for detecting *Trypanosoma brucei* gambiense-specific minicircles. *NAR Genom Bioinform.* 2022;4(4):lqac081. doi:10.1093/nargab/lqac081
  
21. Franco JR, Simarro PP, Diarra A, Ruiz-Postigo JA, Jannin JG. The journey towards elimination of gambiense human African trypanosomiasis: not far, nor easy. *Parasitology.* 2014;141(6):748-760

22. Mehlitz D, Molyneux DH. The elimination of *Trypanosoma brucei gambiense*? Challenges of reservoir hosts and transmission cycles: Expect the unexpected. *Parasite Epidemiology and Control*. 2019;6:e00113

23. Moher D, Shamseer L, Clarke M, et al. Preferred reporting items for systematic review and meta-analysis protocols (PRISMA-P) 2015 statement. *Systematic Reviews*. 2015;4(1):1. doi:10.1186/2046-4053-4-1

24. Nmorsi OPG, Isaac C, Igbinosa IB, Umukoro DO, Aitaikuru DP. Human African trypanosomiasis in endemic focus of Abraka, Nigeria. *Asian Pacific Journal of Tropical Medicine*. 2010;3(6):448-450. doi:10.1016/S1995-7645(10)60107-1

25. Solomon Ngutor K, Idris LA, Oluseyi Oluyinka O. Silent Human *Trypanosoma brucei gambiense* Infections around the Old Gboko Sleeping Sickness Focus in Nigeria. *Journal of parasitology research; J Parasitol Res*. 2016;2016:2656121-5. doi:10.1155/2016/2656121

26. Uba BV, Aliyu A, Abubakar A, et al. Knowledge and prevalence of human african trypanosomiasis among residents of kachia grazing reserve, Kachia local government area, Kaduna state, Nigeria, 2012. *Pan African Medical Journal*. 2016;23. doi:10.11604/pamj.2016.23.89.7999

27. Daniel AD, Dadah AJ, Kalejaiye JO, Dalhatu AD. Prevalence of bovine trypanosomiasis in Gongola State of Northern Nigeria. *Rev Elev Med Vet Pays Trop*. 1993;46(4):571-574. <https://search.ebscohost.com/login.aspx?direct=true&db=mnh&AN=7915428&site=ehost-live>

28. Enwezor FNC, Umoh JU, Esievo KAN, Halid I, Zaria LT, Anere JI. Survey of bovine trypanosomosis in the Kachia Grazing Reserve, Kaduna State, Nigeria. *Vet Parasitol.* 2009;159(2):121-125. doi:10.1016/j.vetpar.2008.10.032
29. Habeeb IF, Chechet GD, Kwaga JKP. Molecular identification and prevalence of trypanosomes in cattle distributed within the Jebba axis of the River Niger, Kwara state, Nigeria. *Parasites & vectors.* 2021;14(1):560. doi:10.1186/s13071-021-05054-0
30. Majekodunmi AO, Fajinmi A, Dongkum C, Picozzi K, Thrusfield MV, Welburn SC. A longitudinal survey of African animal trypanosomiasis in domestic cattle on the Jos Plateau, Nigeria: Prevalence, distribution and risk factors. *Parasites and Vectors.* 2013;6(1). doi:10.1186/1756-3305-6-239
31. Takeet MI, Fagbemi BO, De Donato M, et al. Molecular survey of pathogenic trypanosomes in naturally infected Nigerian cattle. *Res Vet Sci.* 2013;94(3):555-561. doi:10.1016/j.rvsc.2012.10.018
32. Omeke BC. Pig trypanosomosis: prevalence and significance in the endemic Middle Belt zone of southern Nigeria. *Rev Elev Med Vet Pays Trop.* 1994;47(4):381-386. <https://search.ebscohost.com/login.aspx?direct=true&db=mnh&AN=7770662&site=ehost-live>
33. Onah D, Ebenebe O. Isolation of a human serum-resistant Trypanosoma brucei from a naturally infected pig in the Nsukka area of Enugu State. *Nigerian Veterinary Journal.* 2004;24. doi:10.4314/nvj.v24i1.3435

34. Daniel AD, Joshua RA, Kalejaiye JO, Dada AJ. Prevalence of trypanosomiasis in sheep and goats in a region of northern Nigeria. *Rev Elev Med Vet Pays Trop.* 1994;47(3):295-297.

<https://search.ebscohost.com/login.aspx?direct=true&db=mnh&AN=7709031&site=ehost-live>

35. Kalu AU, Lawani FA. Observations on the epidemiology of ruminant trypanosomosis in Kano State, Nigeria. *Rev Elev Med Vet Pays Trop.* 1996;49(3):213-217.

<https://search.ebscohost.com/login.aspx?direct=true&db=mnh&AN=9091992&site=ehost-live>

36. Wayo B, Samdi SM, Fajinmi AO, et al. Prevalence of trypanosomiasis in sheep in the Kachia grazing reserve, Kachia, Kaduna State, Nigeria. *African Journal of Clinical and Experimental Microbiology.* 2017;18(2):120-123. doi:10.4314/ajcem.v18i2.10

37. Umeakuana PU, Gibson W, Ezeokonkwo RC, Anene BM. Identification of *Trypanosoma brucei gambiense* in naturally infected dogs in Nigeria. *Parasit Vectors.* 2019;12(1):420. doi:10.1186/s13071-019-3680-8

38. Solomon NK, Lawal I, Shalangwa I, et al. Animal reservoirs of *Trypanosoma brucei gambiense* around the old Gboko sleeping sickness focus in Nigeria. 2016;8:47-54. doi:10.5897/JPVB2015.0228

39. Enwezor F, Emmanuel R, Olanrewaju T, et al. Investigation of livestock for presence of *Trypanosoma brucei gambiense* in Tafa Local Government Area of Niger State, Nigeria  
INVESTIGATION OF LIVESTOCK FOR PRESENCE OF TRYPANOSOMA BRUCEI  
GAMBIENSE IN TAFALocal Government Area of Niger State, Nigeria.  
2019

40. Selby R, Wamboga C, Erphas O, et al. Gambian human African trypanosomiasis in North West Uganda. Are we on course for the 2020 target? *PLoS Negl Trop Dis*. 2019;13(8):e0007550. doi:10.1371/journal.pntd.0007550
41. Koné M, Kaba D, Kaboré J, et al. Passive surveillance of human African trypanosomiasis in Côte d'Ivoire: Understanding prevalence, clinical symptoms and signs, and diagnostic test characteristics. *PLOS Neglected Tropical Diseases*. 2021;15(8):e0009656. doi:10.1371/journal.pntd.0009656
42. WHO. GHO | By category | Number of new reported cases (T.b. gambiense) - Data by country. WHO Web site. <https://apps.who.int/gho/data/node.main.A1636?lang=en>. Updated 2023. Accessed Aug 21, 2023
43. Mwiinde AM, Simuunza M, Namangala B, et al. Healthcare Management of Human African Trypanosomiasis Cases in the Eastern, Muchinga and Lusaka Provinces of Zambia. *Trop Med Infect Dis*. 2022;7(10):270. doi:10.3390/tropicalmed7100270
44. Odeniran PO, Ademola IO. A meta-analysis of the prevalence of African animal trypanosomiasis in Nigeria from 1960 to 2017. 2018;11(1):280. doi:10.1186/s13071-018-2801-0
45. Boundenga L, Mombo IM, Augustin M, et al. Molecular Identification of Trypanosome Diversity in Domestic Animals Reveals the Presence of *Trypanosoma brucei gambiense* in Historical Foci of Human African Trypanosomiasis in Gabon. *Pathogens*. 2022;11(9):992. doi:10.3390/pathogens11090992

46. Simo G, Asonganyi T, Nkinin SW, Njiokou F, Herder S. High prevalence of *Trypanosoma brucei* gambiense group 1 in pigs from the Fontem sleeping sickness focus in Cameroon. *Vet.Parasitol.* 2006;139(1):57-66. doi:10.1016/j.vetpar.2006.02.026
47. Njiokou F, Nimpaye H, Simo G, et al. Domestic animals as potential reservoir hosts of *Trypanosoma brucei* gambiense in sleeping sickness foci in Cameroon. *Parasite.* 2010;17(1):61-66. doi:10.1051/parasite/2010171061
48. Hall MK, Kea B, Wang R. Recognising Bias in Studies of Diagnostic Tests Part 1: Patient Selection. *Emerg Med J.* 2019;36(7):431-434. doi:10.1136/emmermed-2019-208446
49. Shreffler J, Huecker MR. Diagnostic Testing Accuracy: Sensitivity, Specificity, Predictive Values and Likelihood Ratios. In: Diagnostic Testing Accuracy: Sensitivity, Specificity, Predictive Values and Likelihood Ratios. In: *StatPearls* StatPearls Publishing; 2023. <http://www.ncbi.nlm.nih.gov/books/NBK557491/>. Accessed Aug 29, 2023
50. Okello I, Mafie E, Eastwood G, Nzalawahe J, Mboera LE. African animal trypanosomiasis: A systematic review on prevalence, risk factors and drug resistance in sub-Saharan Africa. *J.Med.Entomol.* 2022;59(4):1099-1143
51. Picozzi K, Tilley A, Fevre EM, et al. The diagnosis of trypanosome infections: applications of novel technology for reducing disease risk. 2002;1(2):39-45
52. Contreras Garcia M, Walshe E, Steketee PC, et al. Comparative Sensitivity and Specificity of the 7SL sRNA Diagnostic Test for Animal Trypanosomiasis. 2022;9. <https://www.frontiersin.org/articles/10.3389/fvets.2022.868912>



53. Inojosa WO, Augusto I, Bisoffi Z, et al. Diagnosing human African trypanosomiasis in Angola using a card agglutination test: observational study of active and passive case finding strategies. *BMJ*. 2006;332(7556):1479. doi:10.1136/bmj.38859.531354.7C

54. Chappuis François, Louis L, Pere S, Veerle L, Büscher Philippe. Options for Field Diagnosis of Human African Trypanosomiasis. *Clin.Microbiol.Rev.* 2005;18(1):133-146. doi:10.1128/cmr.18.1.133-146.2005
